# Supplementary material for: A water-soluble, upconverting Sr2Yb0.3Gd0.7F7:Er3+/Tm3+@PSIoAmbio-probe forin vivotrimodality imaging
Source: Royal Society of Chemistry journal article supplement (doi:10.1039/c8nr03220c), 2018-01-01
Supplement: c8nr03220c1.pdf [file c8nr03220c1.pdf]

Support Information for:

**Water-soluble, upconverting  $\text{Sr}_2\text{Yb}_{0.3}\text{Gd}_{0.7}\text{F}_7\text{:Er}^{3+}/\text{Tm}^{3+}@\text{PSI}_{\text{OAm}}$   
bio-probe for *in vivo* trimodality imaging**

Li-Jun Xiang, Xiao-Jiao Zhu, Hui-Hui Zhang, Li Yang, Ke-Xue Deng, Ying Liu,  
Ming-Shan Ye, Long Hu and Xing-Yuan Yang and Hong-Ping Zhou\*

**Content**

|                                                                                                        |   |
|--------------------------------------------------------------------------------------------------------|---|
| S1. Materials.....                                                                                     | 2 |
| S2. Synthesis route of $\text{PSI}_{\text{OAm}}$ .....                                                 | 2 |
| S3. Characterizations.....                                                                             | 2 |
| S4. The characterizations of as-prepared $\text{Sr}_2\text{Yb}_x\text{Gd}_{1-x}\text{F}_7$<br>NCs..... | 3 |
| S5. The applications in MR and CT imaging.....                                                         | 6 |

## S1. Materials

NH<sub>4</sub>F (99.99%), SrCl<sub>2</sub> (99.99%), Ln(NO<sub>3</sub>)<sub>3</sub>·6H<sub>2</sub>O (Ln = Gd, Yb, Er and Tm), oleylamine and oleic acid were purchased from Sigma-Aldrich. Polysuccinimide (PSI) was purchased from Shijiazhuang Desai Chemical Company. Other chemicals are of analytical grade and used as received without further purification.

## S2. Preparation of the oleylamine modification of polysuccinimide

1.6 g of polysuccinimide (PSI) was dissolved in 32 mL of N, N-Dimethylformamide (DMF) at 60 °C under magnetic stirring followed by the addition of oleylamine (1.63 mL). The mixture was treated at 100 °C for 5 h before cooling to room temperature. Then methanol (80 mL) was added to precipitate the product (PSI<sub>OAm</sub>). Finally, the PSI<sub>OAm</sub> was collected after centrifugation and evaporating the residual methanol.

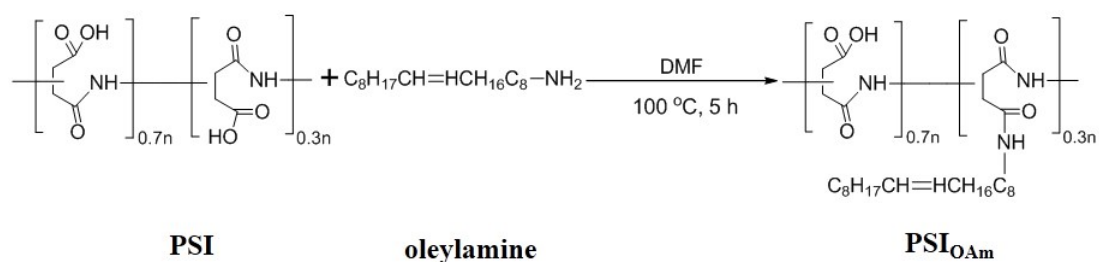

**Scheme S1.** Synthetic routine of PSI<sub>OAm</sub>

## S3. Characterization

The crystal structures of as-prepared samples were characterized by a powder X-ray diffraction (XRD) apparatus (D/Max 2500). The morphology, and element constitution of the samples were characterized by transmission electron microscopy (TEM) and high resolution transmission electron microscopy (HRTEM, JEOL 2100) equipped with an Oxford instrument energy dispersive X-ray spectroscopy (EDS) system at the accelerating voltage of 200 kV. Upconversion emission spectra were recorded by a fluorescence spectrophotometer (R500) under the excitation of a 980 nm laser. The surface structure of PSI<sub>OAm</sub>-modified UCNCs was tested by Fourier transform infrared spectra (Vertex80+Hyperion2000/Vertex80+ Hyperion2000). The magnetic properties of the samples were evaluated by Physical Property Measurement

System (PPMS- 9/PPMS EC II -9T). Upconversion optical bioimaging was performed under a confocal laser scanning microscope (ZEISS710). In vivo UCL imaging was performed by in vivo imaging system (Berthold Technologies: NightOWL LB983). CT and MRI experiments were conducted in AnHui Provincial Hospital (Hefei, China).

#### S4. The characterization of as-prepared $\text{Sr}_2\text{Yb}_x\text{Gd}_{1-x}\text{F}_7$ nanocrystals

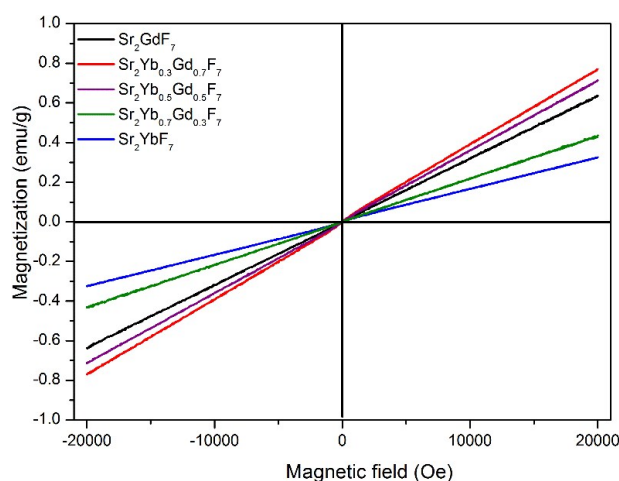

**Fig. S1** Magnetization as a function of an applied field for  $\text{Sr}_2\text{Yb}_x\text{Gd}_{1-x}\text{F}_7$ : 0.2% $\text{Er}^{3+}$ /0.2% $\text{Tm}^{3+}$  doped with different  $\text{Gd}^{3+}$  contents.

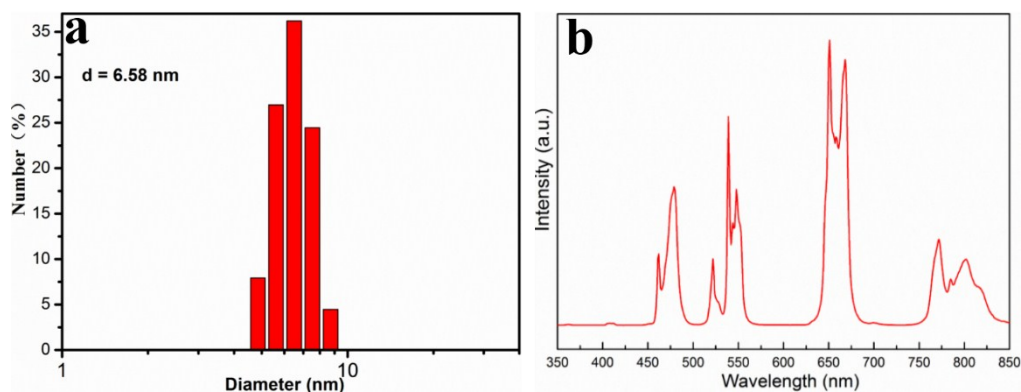

**Fig. S2** (a) The size distribution diagram of  $\text{Sr}_2\text{Yb}_{0.3}\text{Gd}_{0.7}\text{F}_7$ : 0.2% $\text{Er}^{3+}$ / 0.2%  $\text{Tm}^{3+}$ ; (b) Upconversion luminescence spectra of  $\text{Sr}_2\text{Yb}_{0.3}\text{Gd}_{0.7}\text{F}_7$ : 0.2% $\text{Er}^{3+}$ / 0.2%  $\text{Tm}^{3+}$

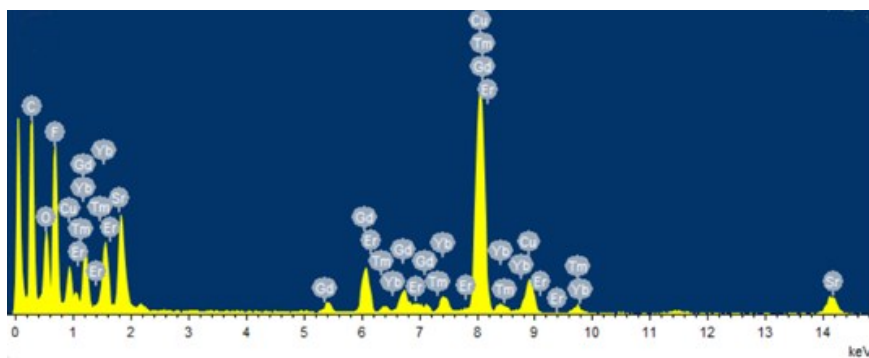

**Fig. S3** EDS spectra of as-synthesized  $\text{Sr}_2\text{Yb}_{0.3}\text{Gd}_{0.7}\text{F}_7: 0.2\%\text{Er}^{3+}/0.2\%\text{Tm}^{3+}$ .

| Element | Weight percentage | Atom percentage |
|---------|-------------------|-----------------|
| C K     | 8.84              | 34.93           |
| O K     | 1.80              | 5.36            |
| F K     | 4.44              | 11.10           |
| Cu K    | 48.83             | 36.45           |
| Sr L    | 6.59              | 3.56            |
| Gd L    | 15.85             | 4.79            |
| Er L    | 3.31              | 0.95            |
| Tm L    | 3.52              | 1.00            |
| Yb L    | 6.82              | 1.85            |
| Total   | 100.00            |                 |

**Table S1** the EDS spectrum analysis of the content of the elements of  $\text{Sr}_2\text{Yb}_{0.3}\text{Gd}_{0.7}\text{F}_7: \text{Er}^{3+}/\text{Tm}^{3+}$

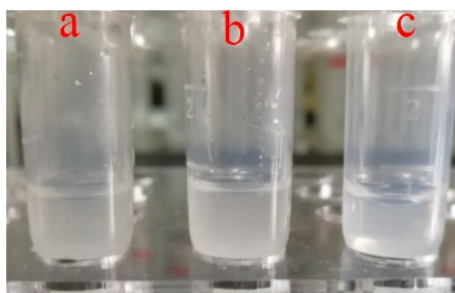

**Fig. S4** The images of  $\text{Sr}_2\text{Yb}_{0.3}\text{Gd}_{0.7}\text{F}_7: 0.2\%\text{Er}^{3+}/0.2\%\text{Tm}^{3+}$  with different modifiers aqueous solution of 2500  $\mu\text{g/mL}$ : (a)  $\text{Sr}_2\text{Yb}_{0.3}\text{Gd}_{0.7}\text{F}_7: 0.2\%\text{Er}^{3+}/0.2\%\text{Tm}^{3+}@\text{SiO}_2$ , (b)  $\text{Sr}_2\text{Yb}_{0.3}\text{Gd}_{0.7}\text{F}_7: 0.2\%\text{Er}^{3+}/0.2\%\text{Tm}^{3+}@\text{PEG}$  and (c)  $\text{Sr}_2\text{Yb}_{0.3}\text{Gd}_{0.7}\text{F}_7: 0.2\%\text{Er}^{3+}/0.2\%\text{Tm}^{3+}@\text{PSI}_{\text{OAm}}$ .

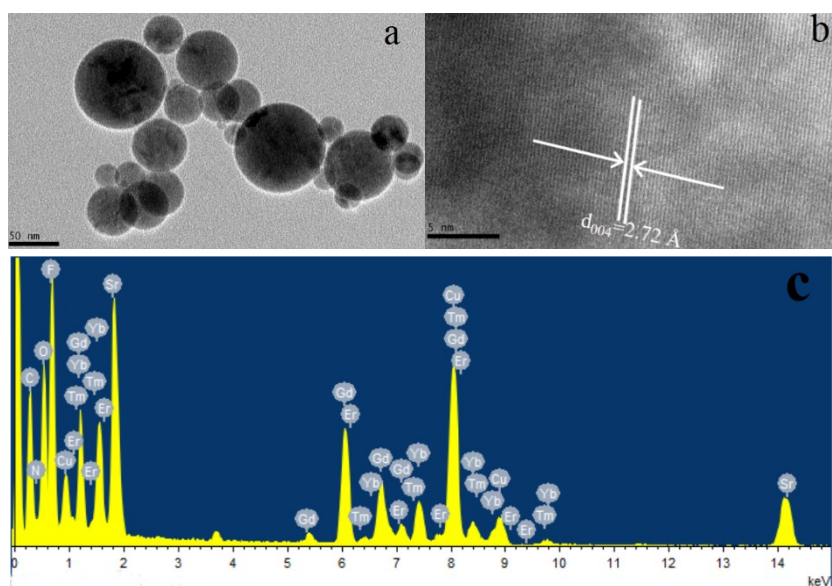

**Fig. S5** TEM, HRTEM and EDS of the UCNCs@PSI<sub>OAm</sub>: (a) TEM image, (b) HRTEM image and (c) EDS spectra.

| Element | Weight percentage | Atom percentage |
|---------|-------------------|-----------------|
| C K     | 4.72              | 22.64           |
| N K     | 0.04              | 0.17            |
| O K     | 3.20              | 11.52           |
| F K     | 5.26              | 15.96           |
| Cu K    | 27.80             | 25.23           |
| Sr L    | 11.42             | 7.49            |
| Gd L    | 33.13             | 12.15           |
| Er L    | 0.78              | 0.29            |
| Tm L    | 0.83              | 0.29            |
| Yb L    | 12.82             | 4.26            |
| Total   | 100.00            |                 |

**Table S2** the EDS spectrum analysis of the content of the elements of the UCNCs@PSI<sub>OAm</sub>.

## S5. The application in MR and CT imaging

| Materials                                        | $r_1/[Gd^{3+}](mM^{-1}s^{-1})$ | References                                                 |
|--------------------------------------------------|--------------------------------|------------------------------------------------------------|
| our sample                                       | 2.88                           | /                                                          |
| Gd-DTPA                                          | 3.587                          | <i>Nanoscale</i> , 2017, 9, 4620-4628.                     |
| $Sr_2LuF_7:Yb/Er@Sr_2GdF_7@SrF_2$                | 0.1515                         | <i>ACS Appl. Mater. Interfaces</i> , 2017, 9, 5748-5758.   |
| $NaYbF_4: Tm^{3+}/Gd^{3+}$                       | 0.8                            | <i>Biomaterials</i> , 2017, 115, 90-103.                   |
| $NaGdF_4:Yb,Er,Mn,Co@mSiO_2-CuS$                 | 1.1                            | <i>Nanoscale</i> , 2017, 9, 4759-4769.                     |
| $BaYbF_5: Gd^{3+}/Er^{3+}$                       | 1.053                          | <i>Mater. Sci. Eng., C</i> , 2017, 75, 510-516.            |
| $NaYF_4:Yb^{3+}/Tm^{3+}@NaGdF_4:Yb^{3+}-DPP-PEG$ | 1.3725                         | <i>J. Am. Chem. Soc.</i> , 2013, 135, 18920-18929.         |
| $Fe_3O_4@β-NaGdF_4:Yb/Er$                        | 2.9                            | <i>COORDIN. CHEM. REV.</i> , 2018, 364, 10-32.             |
| PEG- $GdF_3:Fe$                                  | 3.3                            | <i>Nanoscale</i> , 2018, 10, 1394-1402.                    |
| $NaYbF_4:Tm@NaGdF_4:Yb-PVP$                      | 3.58                           | <i>Science Bulletin</i> , 2017, 62, 903-912.               |
| $NaGdF_4:Yb/Tm@SiO_2@TiO_2@FA$                   | 4.53                           | <i>Biomaterials</i> , 2015, 44, 82-90.                     |
| PBMn-52                                          | 4.9                            | <i>ACS Appl. Mater. Interfaces</i> , 2017, 9, 13875-13886. |
| $(PEG-NaGd(WO_4)_2Eu$                            | $7.3 \pm 0.3$                  | <i>Nanoscale</i> , 2018, 10, 1607-1612.                    |
| AuGds                                            | 12.39                          | <i>Nanoscale</i> , 2017, 9, 4620-4628.                     |
| Gd-FA-PFBT                                       | 16.98                          | <i>Adv. Funct. Mater.</i> 2018, 28, 1707174-1707192.       |

**Table S3** Comparison of Ionic Relaxivity ( $r_1$ ) Values of  $Gd^{3+}$ -Based NPs.

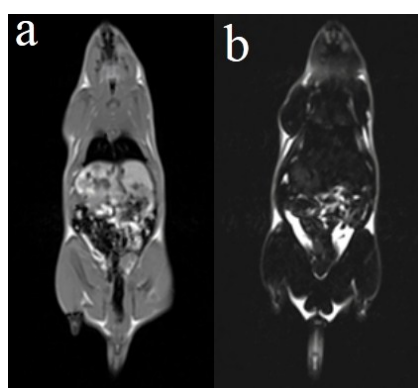

**Fig. S6** *In vivo* T2-weighted MR images of the rat: (a) pre-injection, (b) post-intravenous injection.

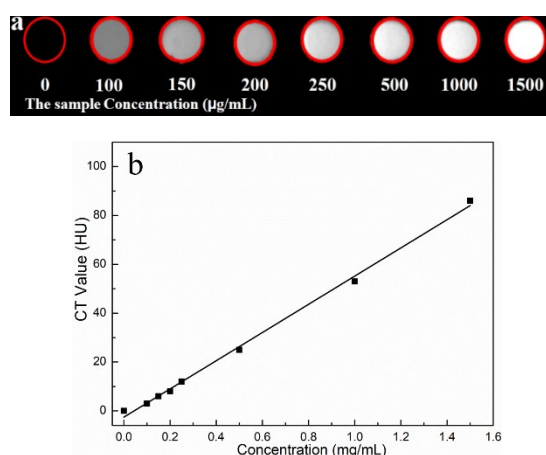

**Fig. S7** (a) CT images of the UCNs@PSI<sub>OAm</sub> aqueous solution at various concentration; (b) CT value for the various concentrations of the UCNs@PSI<sub>OAm</sub>.

| Materials                                                                               | CT value<br>(HU) | Concentration<br>(mg/mL) | References                                                 |
|-----------------------------------------------------------------------------------------|------------------|--------------------------|------------------------------------------------------------|
| our sample                                                                              | ~53              | 1                        | /                                                          |
| iobitridol                                                                              | ~27.2            | 1                        | <i>Nanoscale</i> , 2018, 10, 1394-1402.                    |
| K <sub>0.3</sub> Bi <sub>0.7</sub> F <sub>2.4</sub> :Yb <sup>3+</sup> /Tm <sup>3+</sup> | ~30              | 1                        | <i>ACS Appl. Mater. Interfaces</i> , 2017, 9, 20426-20434. |
| BaGdF <sub>5</sub> @MPN                                                                 | ~35              | 1                        | <i>J Mater Sci: Mater Med.</i> , 2017, 28, 74-84.          |
| PEG-GdF <sub>3</sub> :Fe                                                                | ~44.2            | 1                        | <i>Nanoscale</i> , 2018, 10, 1394-1402.                    |
| NaYF <sub>4</sub> :Yb/Tm@NaGdF <sub>4</sub> :Yb <sup>3+</sup> -DPP-PEG                  | ~50              | 1                        | <i>J. Am. Chem. Soc.</i> , 2013, 135, 18920 -18929.        |
| AuGds                                                                                   | ~55.1            | 1                        | <i>Nanoscale</i> , 2017, 9, 4620-4628.                     |
| GNCNs-Gd                                                                                | ~60              | 1                        | <i>Biomaterials</i> , 2017, 120, 103-114.                  |
| Fe-mTa <sub>2</sub> O <sub>5</sub> @CuSZnPc/PCM                                         | ~62.74           | 1                        | <i>Inorg. Chem.</i> , 2018, 7, 136-145                     |
| NaYbF <sub>4</sub> :Tm@NaGdF <sub>4</sub> :Yb-PVP                                       | ~90              | 1                        | <i>Science Bulletin</i> , 2017, 62, 903-912.               |
| MnO@Au                                                                                  | ~91.15           | 1                        | <i>Nanoscale</i> , 2018,10, 3631-3638.                     |

**Table S4** Comparison of CT value of the existing CT contrast agent.

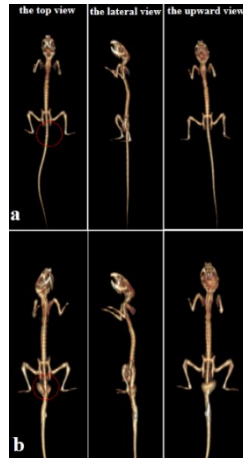

**Fig. S8** The 3D renderings of *in vivo* CT images of a mice based on the UCNCs@PSI<sub>OAm</sub>: (a) pre-injection and (b) post-injection.

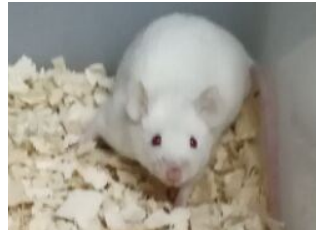

**Fig. S9** The photo of the injected mouse after 20 days.

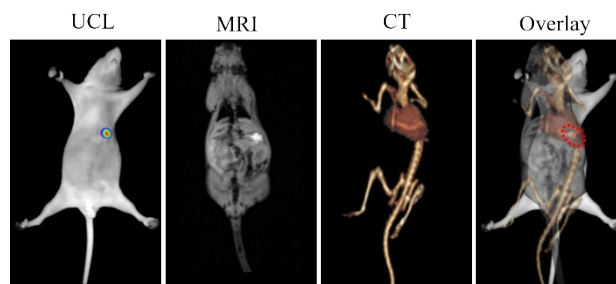

**Fig. S10** The overly image of CT, MR and UCL.
